# Supplementary material for: COVID-19 Pediatric Follow-Up: Respiratory Long COVID-Associated Comorbidities and Lung Ultrasound Alterations in a Cohort of Italian Children
Source: MDPI journal article supplement (doi:10.3390/children11020166), 2024-01-27
Supplement: s1 [file s1]

## SCHEDA VALUTAZIONE PAZIENTE IN FOLLOW-UP PER COVID-19

NOME .....

COGNOME .....

DATA DI NASCITA .....

DATA PRIMO TAMPONE POSITIVO .....

DATA TAMPONE NEGATIVO .....

DURATA MALATTIA .....

GESTIONE MALATTIA: ☐ A DOMICILIO

☐ IN OSPEDALE

### SINTOMATOLOGIA:

- ☐ FEBBRE (T max ..... DURATA.....)
- ☐ TOSSE
- ☐ DOLORE PLEURICO
- ☐ FAME D'ARIA
- ☐ SpO2 < 95%
- ☐ ASINTOMATICO
- ☐ ALTRO .....

### TERAPIA PRATICATA:

DURATA TERAPIA .....

- ☐ ANTIPIRETICO
- ☐ CORTISONE
- ☐ ANTIBIOTICO
- ☐ OSSIGENO
- ☐ ALTRO.....

IL PAZIENTE ERA AFFETTO DA QUALCHE PATOLOGIA RESPIRATORIA IN PRECEDENZA? ☐ SI ☐ NO

Se sì specificare quale e se ci sono state esacerbazioni della malattia:

.....  
.....  
.....

### ESAME OBIETTIVO TORACICO:

.....  
.....

### SIX MINUTE WALKING TEST:

**SPIROMETRIA BASALE .....**

**SPIROMETRIA DOPO TEST DI BRONCODILATAZIONE CON SALBUTAMOLO .....**

**ECOGRAFIA POLMONARE:**

.....

.....

.....

.....

.....
